# Supplementary material for: Comparative Genome-wide Analysis and Expression Profiling of Histone Acetyltransferase (HAT) Gene Family in Response to Hormonal Applications, Metal and Abiotic Stresses in Cotton
Source: MDPI journal article supplement (doi:10.3390/ijms20215311), 2019-10-25
Supplement: s1 [file s1]

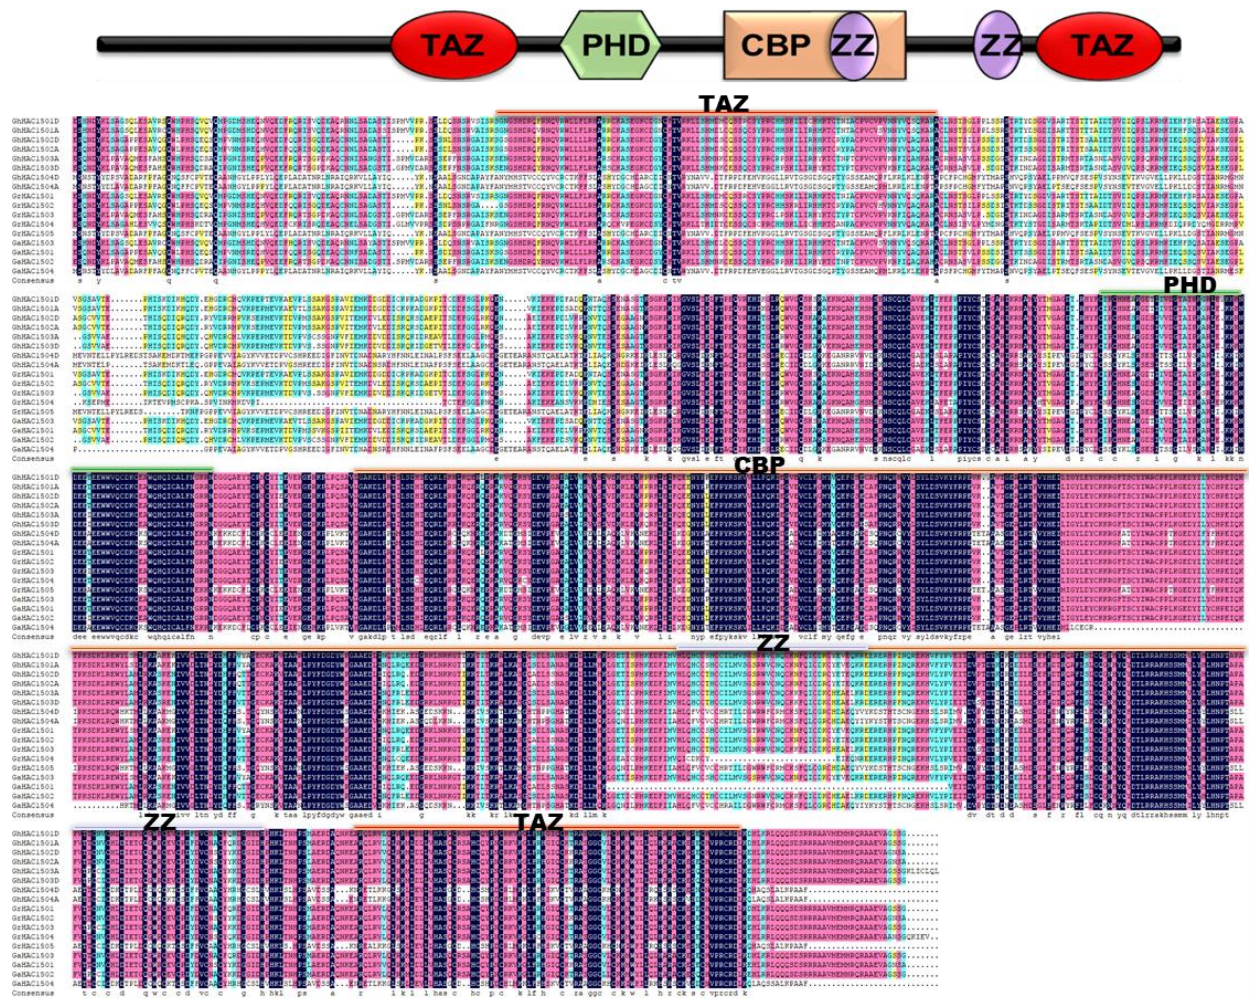

Figure S2 A

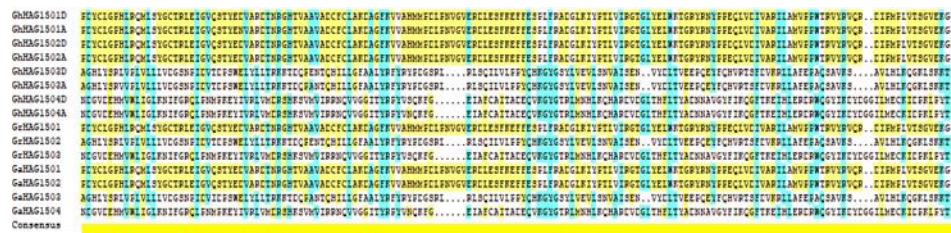

Figure S2 B



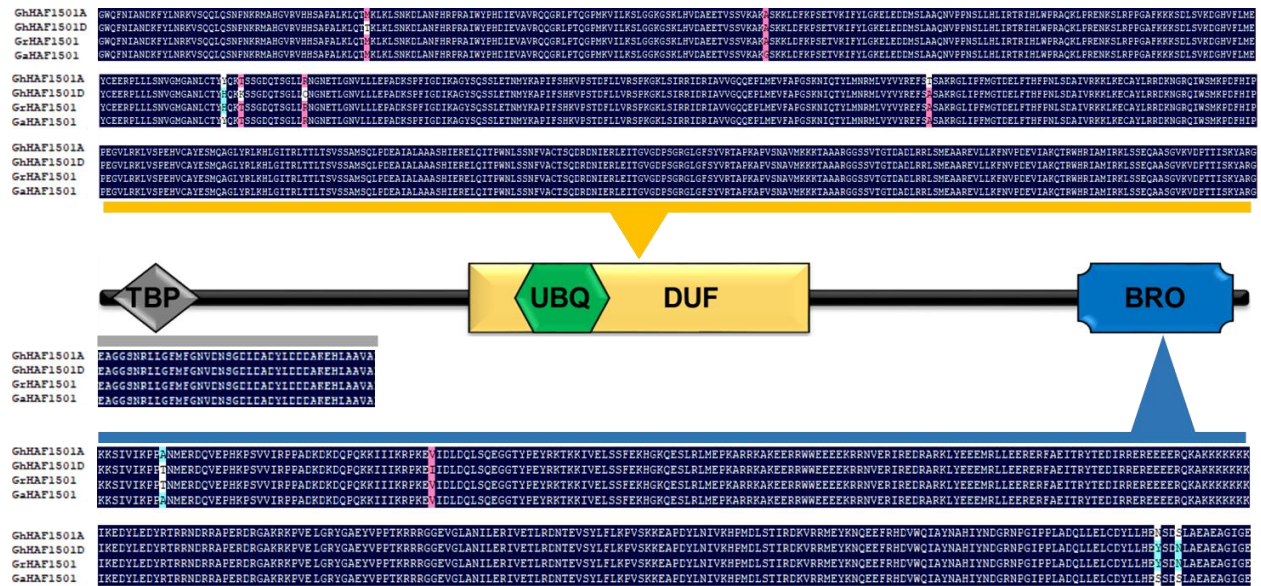

Figure S2 C

**Figure S2** The amino acid sequence alignment of CBP (2A), GNAT (2B) and TAFii250 (2C) subgroups from *G. hirsutum*, *G. raimondii*, and *G. arboreum*. The conserved residues are highlighted in different colors.
